# Supplementary material for: Cranial Morphology of Lithuanian Indigenous Wattle Pigs and Their Hybrids with Wild Boar
Source: MDPI journal article supplement (doi:10.3390/ani13091453), 2023-04-24
Supplement: s1 [file s1]

Table S1. The weight of animals and skull measurements

| Nr.   | Genotype | Lytis/Sex | Svoris/<br>wheight | Galvos<br>sv/<br>head | Skull<br>sv | Ap<br>žand sv | GL    | CBL   | BL    | ZW    | OB    | PL    | UTR  | MR   | PO   | POP   | FP   | NL    | OHB  | SH    | LTR  | IR   |
|-------|----------|-----------|--------------------|-----------------------|-------------|---------------|-------|-------|-------|-------|-------|-------|------|------|------|-------|------|-------|------|-------|------|------|
| 2830  | LV       | kiaulaitė | 92,0               | 5,10                  | 0,733       | 0,234         | 22,80 | 23,73 | 23,77 | 13,70 | 13,70 | 12,30 | 7,14 | 4,20 | 3,40 | 9,50  | 4,50 | 11,15 | 6,13 | 18,60 | 7,10 | 3,32 |
| 3444  | LV       | kiaulaitė | 88,0               | 5,06                  | 0,917       | 0,302         | 22,30 | 23,90 | 22,75 | 14,15 | 18,00 | 11,44 | 7,43 | 4,49 | 4,73 | 10,18 | 3,42 | 10,61 | 6,60 | 18,10 | 7,80 | 2,50 |
| 4107  | LV       | kiaulaitė | 88,0               | 4,86                  | 0,829       | 0,291         | 23,54 | 24,55 | 23,39 | 13,59 | 7,80  | 11,90 | 7,10 | 4,30 | 3,81 | 9,72  | 4,70 | 11,10 | 6,80 | 21,00 | 7,72 | 1,17 |
| 4998  | LV       | kiaulaitė | 84,0               | 4,20                  | 0,697       | 0,229         | 23,05 | 24,34 | 23,00 | 13,19 | 7,40  | 11,84 | 6,70 | 4,30 | 3,60 | 9,58  | 4,20 | 11,00 | 6,70 | 19,40 | 7,00 | 2,00 |
| 6329  | LV       | kiaulaitė | 94,0               | 5,06                  | 0,790       | 0,255         | 24,00 | 25,39 | 23,95 | 13,90 | 7,60  | 12,52 | 7,20 | 4,31 | 3,88 | 9,63  | 4,12 | 12,13 | 7,50 | 18,90 | 3,21 | x    |
| 6332  | LV       | kiaulaitė | 89,0               | 4,40                  | 0,895       | 0,293         | 22,12 | 24,00 | 22,55 | 13,70 | 7,63  | 11,50 | 6,43 | 4,35 | 4,80 | 9,48  | 3,99 | 11,10 | 6,32 | 20,50 | 6,70 | 1,79 |
| 6334  | LV       | kiaulaitė | 96,0               | 5,22                  | 0,871       | 0,284         | 22,00 | 24,62 | 23,25 | 13,64 | 8,03  | 11,54 | 6,78 | 4,45 | 3,85 | 9,55  | 3,17 | 11,24 | 6,80 | 20,90 | 7,50 | 1,60 |
| 3446  | LV       | kastratas | 90,0               | 4,74                  | 0,890       | 0,300         | 20,61 | 22,31 | 21,50 | 13,22 | 7,50  | 11,00 | 8,00 | 4,31 | 4,60 | 9,04  | 3,05 | 10,20 | 6,30 | 18,35 | 7,50 | 2,65 |
| 3441  | LV       | kastratas | 88,0               | 4,62                  | 0,677       | 0,216         | 22,30 | 23,90 | 22,62 | 13,63 | 8,50  | 11,70 | 7,00 | 4,60 | 4,80 | 9,71  | 3,70 | 10,23 | 6,24 | 18,50 | 7,79 | 2,00 |
| 3447  | LV       | kastratas | 92,0               | 4,98                  | 0,864       | 0,293         | 21,61 | 22,90 | 21,41 | 14,14 | 7,90  | 11,39 | 6,33 | 4,10 | 4,60 | 9,92  | 4,30 | 9,72  | 7,32 | 20,80 | 7,00 | 1,90 |
| 4108  | LV       | kastratas | 95,0               | 4,88                  | 0,847       | 0,266         | 21,21 | 24,12 | 22,60 | 14,15 | 7,73  | 11,60 | 7,30 | 4,56 | 4,46 | 10,20 | 2,91 | 10,40 | 6,80 | 19,00 | 7,42 | 1,95 |
| 4109  | LV       | kastratas | 92,0               | 5,24                  | 0,871       | 0,283         | 21,82 | 24,24 | 22,80 | 13,90 | 7,85  | 11,12 | 7,20 | 4,50 | 4,52 | 9,90  | 3,45 | 10,20 | 6,75 | 18,00 | 7,50 | 1,95 |
| 6330  | LV       | kastratas | 92,0               | 5,46                  | 0,779       | 0,266         | 23,20 | 25,40 | 23,82 | 14,41 | 7,85  | 12,50 | 7,14 | 4,50 | 3,69 | 9,75  | 3,60 | 11,10 | 6,48 | 19,70 | 6,65 | 2,10 |
| 6331  | LV       | kastratas | 93,4               | 5,26                  | 0,915       | 0,290         | 24,30 | 25,84 | 24,30 | 13,67 | 7,75  | 12,80 | 6,90 | 4,55 | 4,00 | 9,91  | 4,23 | 11,74 | 6,86 | 18,54 | 7,24 | 2,24 |
| 6336  | LV       | kastratas | 95,0               | 5,66                  | 1 003       | 0,314         | 22,73 | 25,41 | 24,16 | 14,26 | 8,10  | 12,32 | 6,65 | 6,39 | 4,25 | 10,30 | 3,85 | 11,10 | 7,10 | 21,14 | 6,39 | 1,90 |
| 6339  | LV       | kastratas | 95,0               | 5,30                  | 0,861       | 0,285         | 22,20 | 24,20 | 23,09 | 14,20 | 8,00  | 11,84 | 6,60 | 4,60 | 3,62 | 9,60  | 3,65 | 10,80 | 6,85 | 18,96 | 7,60 | 1,79 |
| be nr | LV       | kastratas |                    |                       | 0,573       | 0,183         | 21,60 | 22,19 | 21,75 | 12,89 | 7,30  | 10,99 | 6,22 | 5,40 | 3,50 | 8,88  | 3,65 | 10,52 | 6,50 | 18,34 | 6,96 | 1,50 |
| 2174  | H25%     | kiaulaitė | 87,4               | 5,65                  | 0,997       | 0,309         | 23,78 | 24,50 | 23,19 | 14,39 | 8,00  | 11,89 | 6,40 | 4,50 | 4,90 | 10,12 | 4,09 | 11,30 | 6,92 | 18,67 | 7,65 | 1,60 |
| 3438  | H25%     | kiaulaitė | 88,6               | 5,10                  | 0,954       | 0,305         | 25,10 | 25,73 | 24,24 | 13,75 | 8,75  | 12,43 | 6,40 | 4,36 | 4,32 | 10,24 | 4,85 | 12,24 | 7,60 | 19,55 | 7,67 | 1,79 |
| 3440  | H25%     | kiaulaitė | 85,0               | 4,72                  | 0,777       | 0,264         | 25,40 | 26,14 | 24,74 | 13,25 | 8,18  | 12,80 | 6,30 | 4,29 | 4,29 | 9,39  | 4,10 | 13,21 | 7,29 | 18,00 | 6,65 | 1,79 |
| 3442  | H25%     | kiaulaitė | 86,6               | 4,66                  | 0,877       | 0,289         | 25,10 | 25,81 | 24,50 | 13,50 | 8,24  | 12,24 | 6,70 | 4,70 | 4,80 | 9,60  | 4,89 | 11,74 | 7,00 | 19,24 | 7,50 | 1,86 |
| 4111  | H25%     | kiaulaitė | 85,1               | 4,90                  | 0,787       | 0,255         | 23,90 | 25,60 | 23,56 | 13,20 | 8,10  | 11,85 | 6,20 | 4,24 | 3,99 | 10,00 | 4,43 | 11,67 | 7,49 | 19,54 | 7,70 | 1,60 |
| 5001  | H25%     | kiaulaitė | 95,2               | 5,24                  | 1 007       | 0,335         | 25,80 | 26,60 | 24,48 | 14,15 | 8,10  | 12,84 | 6,49 | 4,49 | 4,48 | 10,17 | 4,95 | 12,50 | 7,60 | 19,90 | 7,79 | 1,71 |
| 5004  | H25%     | kiaulaitė | 89,2               | 4,86                  | 0,979       | 0,289         | 26,50 | 26,40 | 24,86 | 13,40 | 8,00  | 12,67 | 6,24 | 4,20 | 5,24 | 9,99  | 5,40 | 13,20 | 7,80 | 18,60 | 7,55 | 1,55 |
| 5005  | H25%     | kiaulaitė | 86,4               | 4,76                  | 0,760       | 0,232         | 24,55 | 25,00 | 23,65 | 13,62 | 7,70  | 11,79 | 6,50 | 4,50 | 4,32 | 9,43  | 4,00 | 11,70 | 7,20 | 17,80 | 7,70 | 1,90 |
| 4996  | H25%     | kiaulaitė | 86,0               | 4,86                  | 0,926       | 0,297         | 25,30 | 26,10 | 24,40 | 13,10 | 7,80  | 12,24 | 6,50 | 4,50 | 4,70 | 9,65  | 4,40 | 12,67 | 7,40 | 19,35 | 7,80 | 1,70 |
| 2171  | H25%     | kastratas | 91,0               | 5,95                  | 0,958       | 0,288         | 23,69 | 25,10 | 23,40 | 14,20 | 8,58  | 11,80 | 6,70 | 4,88 | 4,76 | 10,14 | 4,40 | 11,60 | 7,09 | 20,24 | 8,10 | 1,72 |
| 2172  | H25%     | kastratas | 87,0               | 5,20                  | 0,808       | 0,257         | 24,67 | 26,24 | 24,29 | 12,64 | 7,30  | 12,50 | 7,08 | 4,50 | 3,90 | 9,08  | 4,30 | 12,48 | 6,60 | 20,25 | 7,89 | 1,80 |
| 2173  | H25%     | kastratas | 92,4               | 5,65                  | 0,942       | 0,296         | 24,08 | 26,10 | 24,14 | 14,06 | 8,16  | 12,48 | 6,44 | 4,59 | 4,99 | 10,24 | 3,58 | 12,06 | 7,70 | 20,34 | 7,75 | 2,09 |
| 2828  | H25%     | kastratas | 88,0               | 5,25                  | 0,792       | 0,271         | 25,24 | 26,40 | 24,55 | 13,13 | 7,70  | 12,50 | 7,05 | 4,40 | 4,00 | 9,19  | 4,20 | 12,30 | 6,85 | 18,40 | 7,50 | 1,80 |

|      |      |           |      |      |       |       |       |       |       |       |      |       |      |      |      |       |      |       |      |       |      |      |
|------|------|-----------|------|------|-------|-------|-------|-------|-------|-------|------|-------|------|------|------|-------|------|-------|------|-------|------|------|
| 3449 | H25% | kastratas | 83,0 | 4,44 | 0,822 | 0,255 | 24,20 | 25,24 | 23,58 | 13,27 | 7,20 | 12,20 | 6,90 | 4,65 | 4,89 | 9,20  | 4,20 | 11,40 | 7,00 | 16,90 | 7,68 | 1,75 |
| 4110 | H25% | kastratas | 86,3 | 5,08 | 0,949 | 0,311 | 24,20 | 25,75 | 24,00 | 13,10 | 8,08 | 11,70 | 6,52 | 4,40 | 5,12 | 9,74  | 4,10 | 11,74 | 7,09 | 18,54 | 8,20 | 1,42 |
| 4112 | H25% | kastratas | 88,1 | 4,40 | 0,735 | 0,230 | 24,24 | 25,36 | 23,40 | 13,50 | 7,84 | 12,42 | 6,80 | 4,70 | 4,75 | 10,00 | 4,40 | 11,75 | 6,99 | 18,67 | 7,90 | 1,80 |
| 4116 | H25% | kastratas | 90,0 | 4,48 | 0,870 | 0,289 | 22,62 | 24,35 | 22,89 | 13,04 | 8,20 | 11,50 | 6,35 | 4,43 | 4,49 | 9,43  | 3,80 | 10,65 | 6,24 | 18,14 | 7,50 | 1,70 |
| 5006 | H25% | kastratas | 97,4 | 4,62 | 0,751 | 0,242 | 24,80 | 25,40 | 23,24 | 12,79 | 7,50 | 12,10 | 6,30 | 4,40 | 4,20 | 9,30  | 4,39 | 11,79 | 7,60 | 19,30 | 7,70 | 1,89 |
| 4995 | H25% | kastratas | 87,2 | 4,66 | 0,855 | 0,254 | 25,84 | 26,50 | 24,70 | 12,75 | 7,85 | 12,81 | 6,55 | 4,50 | 4,60 | 9,65  | 4,40 | 12,62 | 7,50 | 18,70 | 8,40 | 2,10 |
| 4997 | H25% | kastratas | 86,0 | 4,72 | 0,893 | 0,276 | 24,92 | 25,71 | 23,80 | 13,91 | 7,95 | 12,70 | 6,50 | 4,50 | 4,40 | 9,43  | 4,10 | 12,30 | 7,05 | 18,62 | 7,09 | 2,00 |
| 6337 | H25% | kastratas | 89,5 | 4,44 | 0,860 | 0,260 | 24,64 | 26,35 | 24,41 | 13,67 | 7,80 | 13,00 | 6,64 | 4,74 | 4,00 | 9,52  | 4,49 | 12,16 | 7,54 | 19,00 | 8,14 | 2,24 |
| 1541 | H25% | kuiliukas | 88,4 | 5,80 | 0,953 | 0,305 | 25,31 | 26,16 | 24,45 | 14,50 | 8,49 | 12,58 | 6,60 | 4,55 | 4,72 | 10,12 | 4,16 | 12,20 | 7,35 | 19,13 | 7,33 | 2,18 |
| 1542 | H25% | kuiliukas | 91,2 | 7,10 | 1 188 | 0,382 | 24,80 | 25,55 | 24,34 | 14,90 | 8,33 | 12,20 | 6,86 | 4,80 | 5,45 | 10,80 | 4,86 | 11,95 | 6,79 | 20,25 | 8,00 | 2,31 |
| 2166 | H25% | kuiliukas | 91,0 | 5,98 | 0,898 | 0,283 | 26,70 | 27,95 | 25,74 | 13,58 | 8,36 | 13,39 | 7,19 | 4,49 | 4,20 | 9,81  | 4,40 | 13,66 | 7,12 | 18,39 | 7,54 | 1,86 |
| 2827 | H25% | kuiliukas | 88,4 | 5,15 | 0,820 | 0,260 | 25,55 | 27,14 | 24,79 | 13,35 | 8,16 | 12,85 | 6,75 | 4,25 | 3,92 | 9,92  | 4,50 | 12,53 | 7,18 | 18,28 | 7,84 | 2,24 |
| 2829 | H25% | kuiliukas | 88,8 | 5,75 | 0,889 | 0,293 | 25,98 | 26,87 | 25,30 | 14,00 | 8,75 | 13,35 | 6,45 | 4,18 | 4,22 | 10,24 | 4,75 | 12,20 | 7,35 | 18,89 | 7,60 | 2,25 |
| 2167 | H50% | kuiliukas | 93,0 | 5,52 | 0,991 | 0,335 | 27,95 | 28,08 | 25,74 | 14,20 | 8,60 | 13,39 | 6,99 | 4,79 | 3,43 | 9,99  | 5,05 | 13,40 | 8,24 | 20,08 | 7,50 | 1,90 |
| 9967 | H50% | kuiliukas | 93,2 | 6,36 | 1 011 | 0,314 | 27,62 | 27,90 | 26,57 | 13,85 | 7,67 | 13,70 | 6,72 | 4,73 | 4,69 | 9,54  | 4,61 | 13,62 | 8,05 | 20,10 | 8,71 | 2,60 |
| 9968 | H50% | kuiliukas | 84,2 | 6,54 | 0,874 | 0,271 | 26,20 | 26,24 | 25,02 | 13,89 | 7,75 | 13,15 | 6,89 | 4,60 | 4,35 | 9,45  | 4,29 | 13,70 | 7,59 | 18,70 | 7,60 | 2,21 |
| 9970 | H50% | kuiliukas | 85   | 4,98 | 0,975 | 0,294 | 26,90 | 27,10 | 25,10 | 14,26 | 7,65 | 13,20 | 7,10 | 6,67 | 5,00 | 9,85  | 4,50 | 13,20 | 7,80 | 19,14 | 6,85 | 2,29 |
| 9972 | H50% | kuiliukas | 89   | 5,56 | 1 015 | 0,309 | 28,62 | 27,84 | 26,30 | 14,30 | 8,20 | 13,58 | 6,99 | 4,80 | 5,15 | 10,50 | 5,10 | 13,50 | 8,17 | 18,45 | 7,90 | 2,15 |
| 1097 | H50% | kuiliukas | 88,4 | 5,6  | 0,977 | 0,305 | 27,62 | 27,76 | 26,34 | 13,97 | 7,91 | 13,79 | 6,68 | 4,60 | 4,36 | 9,87  | 4,30 | 14,00 | 8,15 | 18,93 | 8,47 | 2,57 |
| 1098 | H50% | kuiliukas | 90,2 | 6,26 | 1 016 | 0,326 | 27,00 | 28,05 | 26,40 | 14,20 | 8,12 | 13,58 | 7,74 | 4,62 | 4,30 | 10,30 | 4,50 | 13,52 | 8,00 | 21,52 | 7,65 | 2,60 |
| 1099 | H50% | kuiliukas | 88,6 | 6,3  | 0,994 | 0,316 | 27,72 | 28,84 | 26,43 | 14,10 | 8,33 | 13,98 | 6,77 | 4,69 | 4,80 | 10,59 | 4,70 | 13,25 | 8,29 | 19,30 | 7,90 | 2,59 |
| 2168 | H50% | kuiliukas | 93   | 6,3  | 1 157 | 0,353 | 27,79 | 27,31 | 26,00 | 14,58 | 8,12 | 13,59 | 6,70 | 4,59 | 4,40 | 10,42 | 4,60 | 13,90 | 8,82 | 19,72 | 8,04 | 2,20 |
| H1   | H50% | kuiliukas |      |      | 0,855 | 0,286 | 28,40 | 29,20 | 26,74 | 13,48 | 7,99 | 13,11 | 6,86 | 4,74 | 4,23 | 9,70  | 4,80 | 14,12 | 8,05 | 20,45 | 6,62 | 2,24 |
| 9969 | H50% | kastratas | 92   | 5,86 | 0,882 | 0,272 | 26,15 | 27,00 | 24,83 | 13,80 | 7,60 | 12,81 | 6,80 | 4,85 | 4,35 | 9,70  | 4,50 | 12,66 | 7,35 | 17,30 | 7,40 | 1,99 |
| 9971 | H50% | kastratas | 98   | 5,32 | 0,824 | 0,269 | 27,10 | 27,99 | 25,80 | 13,55 | 7,85 | 13,60 | 6,74 | 4,70 | 4,10 | 9,58  | 4,49 | 13,39 | 7,65 | 18,55 | 8,10 | 2,30 |
| 1096 | H50% | kastratas | 85,6 | 5,48 | 0,942 | 0,288 | 25,83 | 26,65 | 25,05 | 13,39 | 8,10 | 12,91 | 6,70 | 4,80 | 3,91 | 9,45  | 3,79 | 12,70 | 7,38 | 19,10 | 7,50 | 2,14 |
| 1100 | H50% | kastratas | 90,8 | 5,92 | 0,875 | 0,281 | 26,70 | 27,43 | 25,31 | 14,10 | 7,99 | 13,28 | 6,60 | 4,83 | 4,22 | 9,43  | 4,20 | 12,89 | 8,24 | 19,67 | 7,65 | 2,60 |
| 1543 | H50% | kastratas | 92,4 | 5,55 | 0,994 | 0,311 | 27,70 | 27,80 | 26,01 | 13,41 | 8,28 | 13,79 | 6,53 | 4,63 | 4,39 | 9,86  | 4,33 | 13,70 | 7,86 | 18,80 | 8,65 | 2,35 |
| 2170 | H50% | kastratas | 93   | 5,95 | 0,868 | 0,267 | 27,12 | 27,40 | 24,90 | 13,48 | 8,04 | 12,79 | 6,90 | 4,70 | 4,00 | 9,59  | 4,71 | 12,81 | 7,90 | 18,10 | 8,00 | 1,80 |
| 2169 | H50% | kastratas | 93   | 5,72 | 1 014 | 0,303 | 26,60 | 26,62 | 25,19 | 13,60 | 7,98 | 13,06 | 6,60 | 4,80 | 4,80 | 9,89  | 4,41 | 13,05 | 8,20 | 18,20 | 8,00 | 2,60 |
| 3437 | H50% | kastratas | 89   | 5,34 | 1 076 | 0,370 | 28,11 | 28,15 | 26,53 | 14,40 | 8,13 | 13,55 | 6,80 | 4,72 | 3,77 | 10,05 | 4,60 | 13,67 | 8,40 | 19,60 | 8,05 | 2,20 |
| 4994 | H50% | kiulaitė  | 97   | 5,12 | 1 099 | 0,371 | 27,33 | 28,90 | 26,62 | 14,20 | 8,46 | 14,00 | 9,24 | 5,65 | 4,20 | 10,48 | 4,40 | 14,24 | 7,90 | 20,40 | 9,39 | 2,20 |
| 4993 | H50% | kiulaitė  | 95   | 5,64 | 1 311 | 0,415 | 28,52 | 28,90 | 26,50 | 14,70 | 8,24 | 13,80 | 8,50 | 5,30 | 5,19 | 10,80 | 4,17 | 13,73 | 8,20 | 19,80 | 9,97 | 2,20 |
| 4999 | H50% | kiulaitė  | 94   | 5,28 | 1 116 | 0,335 | 28,10 | 28,20 | 26,10 | 14,15 | 7,84 | 13,22 | 8,36 | 5,00 | 4,35 | 10,30 | 4,91 | 13,40 | 8,09 | 20,30 | 9,50 | 2,40 |

|           |      |           |      |      |       |       |       |       |       |       |      |       |      |      |      |       |      |       |      |       |       |      |
|-----------|------|-----------|------|------|-------|-------|-------|-------|-------|-------|------|-------|------|------|------|-------|------|-------|------|-------|-------|------|
| 7079      | H75% | kiaulaitė | 111  | 9,26 | 1 240 | 0,405 | 31,93 | 31,40 | 29,55 | 13,90 | 7,98 | 15,70 | 9,60 | 5,79 | 4,00 | 9,99  | 5,37 | 16,10 | 8,45 | 21,30 | 10,60 | 2,50 |
| 7081      | H75% | kiaulaitė | 101  | 8,52 | 1 311 | 0,403 | 33,30 | 32,00 | 30,22 | 14,20 | 8,29 | 16,00 | 9,70 | 6,00 | 4,22 | 10,55 | 5,64 | 17,60 | 8,48 | 19,60 | 10,62 | 2,70 |
| 1232<br>2 | H75% | kiaulaitė | 112  | 8,00 | 1 412 | 0,466 | 33,43 | 33,43 | 31,30 | 14,60 | 8,29 | 17,05 | 9,21 | 5,34 | 3,48 | 10,30 | 5,00 | 18,20 | 8,50 | 20,70 | 10,00 | 2,90 |
| 2422      | H75% | kiaulaitė | 104  | 7,47 | 1 251 | 0,358 | 29,80 | 29,60 | 27,43 | 13,92 | 9,53 | 14,39 | 6,54 | 4,50 | 5,30 | 11,00 | 4,92 | 15,55 | 8,55 | 22,55 | 8,30  | 2,12 |
| 3849      | H75% | kiaulaitė | 87,3 | 6,22 | 0,825 | 0,266 | 25,24 | 26,58 | 25,39 | 13,48 | 8,43 | 12,81 | 6,75 | 4,34 | 4,00 | 9,23  | 4,50 | 12,95 | 6,09 | 19,85 | 7,60  | 2,00 |
| 4877      | H75% | kiaulaitė | 85,6 | 6,14 | 0,953 | 0,299 | 29,10 | 28,76 | 27,00 | 13,22 | 8,30 | 14,79 | 8,41 | 6,54 | 4,33 | 10,00 | 4,40 | 15,81 | 7,85 | 22,74 | 9,45  | 2,50 |
| 4878      | H75% | kiaulaitė | 84,3 | 6,1  | 0,886 | 0,289 | 29,65 | 28,15 | 26,70 | 13,34 | 7,95 | 14,10 | 7,49 | 5,48 | 3,70 | 9,70  | 4,95 | 15,70 | 7,46 | 23,04 | 9,90  | 2,30 |
| 7080      | H75% | kuiliukas | 93   | 8,8  | 1 288 | 0,429 | 32,30 | 31,74 | 30,12 | 14,60 | 8,40 | 16,05 | 9,08 | 5,80 | 4,45 | 10,45 | 5,90 | 16,59 | 8,90 | 20,00 | 10,89 | 2,90 |
